# Supplementary material
Source: PubMed Central journal article supplement (PMC6124529)
Supplement: jciinsight-3-95948-s009.pdf [file jciinsight-3-95948-s009.pdf]

**Supplemental Table 1. Demographic information of patients used in this study.**

| <b>Sex</b> | <b>Age (years)</b> | <b>Ethnicity</b> | <b>Diabetes</b> | <b>Diabetic medications</b>                                   |
|------------|--------------------|------------------|-----------------|---------------------------------------------------------------|
| Male       | 36                 | Caucasian        | Yes             | Metformin                                                     |
| Male       | 48                 | African American | Yes             | Metformin                                                     |
| Male       | 35                 | Asian/Indian     | Yes             | Liraglutide, pioglitazone, metformin, lisinopril, simvastatin |
| Female     | 39                 | Hispanic/Latino  | Yes             | NPH, lispro, metformin                                        |
| Female     | 41                 | African American | Yes             | Unknown                                                       |
|            |                    |                  |                 |                                                               |
| Male       | 39                 | Caucasian        | No              | N/A                                                           |
| Male       | 30                 | Caucasian        | No              | N/A                                                           |
| Male       | 42                 | Caucasian        | No              | N/A                                                           |
| Female     | 32                 | Hispanic/Latino  | No              | N/A                                                           |
| Female     | 24                 | Caucasian        | No              | N/A                                                           |
| Female     | 42                 | African American | No              | N/A                                                           |
