# Supplementary material
Source: PubMed Central journal article supplement (PMC6124529)
Supplement: jciinsight-3-95948-s011.pdf [file jciinsight-3-95948-s011.pdf]

**Supplemental Table 3. Primer sequences for quantitative real-time PCR.**

## Mouse Primers

| Gene Name     | Forward Primer           | Reverse Primer          |
|---------------|--------------------------|-------------------------|
| <i>18s</i>    | AGTCCCTGCCCTTTGTACACA    | CGATCCGAGGGCCTCACTA     |
| <i>Actb</i>   | CCGTGAAAAGATGACCCAGAT    | GTACATGGCTGGGGTGTG      |
| <i>Hprt</i>   | CTGGAAAGAATGTCTTGATTGTTG | TGCATTGTTTTACCAGTGTCAA  |
| <i>Ttp</i>    | CACCATGGATCTCTCTGCCA     | GGTCATGGCTCATCGACTGG    |
| <i>Fgf21</i>  | AAGACACTGAAGCCCACCTG     | CAGGCCTCAGGATCAAAGTGA   |
| <i>Adipoq</i> | GTGGATCTGACGACACCAAA     | GACTGGGCAGGATTAAGAGGA   |
| <i>Slc2a1</i> | GTCAGGGCGTGGAGGTCTGG     | CCTCCACAGCCAACATGAGG    |
| <i>Cidea</i>  | TAAGAGACGCGGCTTTGGG      | GGCGAGCTGGATGTATGAG     |
| <i>Cpt1b</i>  | GAGCCCCCTCATGGTGAACA     | CTTCACGGTCCAGTTTGCG     |
| <i>Dio2</i>   | ACAGCTTCCTCCTAGATGCCT    | CAAGAAGGTGGCATTGCGC     |
| <i>Ucp1</i>   | TGTACACCAAGGAAGGACCG     | GGACCCGAGTCGCAGAAAA     |
| <i>Cox7a</i>  | TGCTGAGGACGCAAATGAGG     | AGCTAAAAGACCGGACCAGA    |
| <i>Cox8b</i>  | GCGAAGTTCACAGTGGTTCC     | GGAACCATGAAGCCAACGAC    |
| <i>Irs2</i>   | TTGAAGGAAGCCACAGTCGT     | GCGATGGGGCTGGTAGC       |
| <i>Cited1</i> | TTATCGGACTTCTGCCCAGG     | CTGCCTTGCGATCCTTCACT    |
| <i>Bmp5</i>   | ACCAACCATGCCATAGTCCAG    | TGGGAACATGGTCTGGAAACA   |
| <i>Clcf1</i>  | TATGACCTCACCCGCTACCT     | ACTTCCAAGTTGACCGTGGC    |
| <i>Col3a1</i> | TTGTGCAAAGTGGAACCTGG     | AGGTGGCTGCATCCCAATTC    |
| <i>Cxcl1</i>  | TGCACCCAAACCGAAGTCAT     | CTCCGTTACTTGGGGACACC    |
| <i>Cxcl2</i>  | TCTCAAGGGCGGTCAAAAAGTT   | TTCTCTTTGGTTCTTCCGTTGAG |

|                             |                         |                         |
|-----------------------------|-------------------------|-------------------------|
| <i>Fam3c</i>                | ACAAGACGGAACAGTAGTGC    | TTCCCACCACAGAAGACCCA    |
| <i>Fstl3</i>                | AGACTTGCGCGTCATGTACC    | CTGATCCACAAGGCACGACT    |
| <i>Lcorl</i> isoform<br>1,2 | CTTCTTCTGAAAATGCAGTGGC  | CCATCTGCAAACCTCAGCACTTC |
| <i>Lcorl</i> isoform<br>3   | GGGATGGAGTGTTAGATCTCTCT | TGTTCCCATCAGACAAATCCACT |
| <i>Lnpep</i>                | CTGAGTGACAAAGACCGAGCC   | CAGTGATCGGTGCAGTGTGG    |

#### Human Primers

| Gene Name      | Forward Primer           | Reverse Primer           |
|----------------|--------------------------|--------------------------|
| <i>18s</i>     | AGTCCCTGCCCTTTGTACACA    | CGATCCGAGGGCCTCACTA      |
| <i>ACTB</i>    | AGGATGCAGAAGGAGATCACTG   | GGGTGTAACGCAACTAAGTCATAG |
| <i>HPRT1</i>   | AGGGATTTGAATCATGTTTGTG   | GGCTTTGTATTTTGCTTTTCCA   |
| <i>TTP</i>     | CCATGGATCTGACTGCCATC     | GTCAGGGCTCAGCGACAG       |
| <i>PPARA-1</i> | GCAACATAGCAAGACCCTGTC    | ACCTCAGCCTGCAGAGTAGC     |
| <i>PPARA-2</i> | GGCAGCGAATGTAGGAAG       | GTTGAGAAAATGAAAAACCGTG   |
| <i>B2M</i>     | AAGCAGCATCATGGAGGTTT     | CAAGCAAGCAGAATTTGGAA     |
| <i>VEGFA</i>   | CCAAAGAAAGATAGAGCAAGACAA | ACACGTCTGCGGATCTTGTA     |
| <i>FGF21</i>   | ATCGCTCCACTTTGACCCTG     | GGGCTTCGGACTGGTAAACA     |
